# Supplementary material
Source: PubMed Central journal article supplement (PMC5589203)
Supplement: NIHMS885442-supplement-supplement_1.pdf [file NIHMS885442-supplement-supplement_1.pdf]

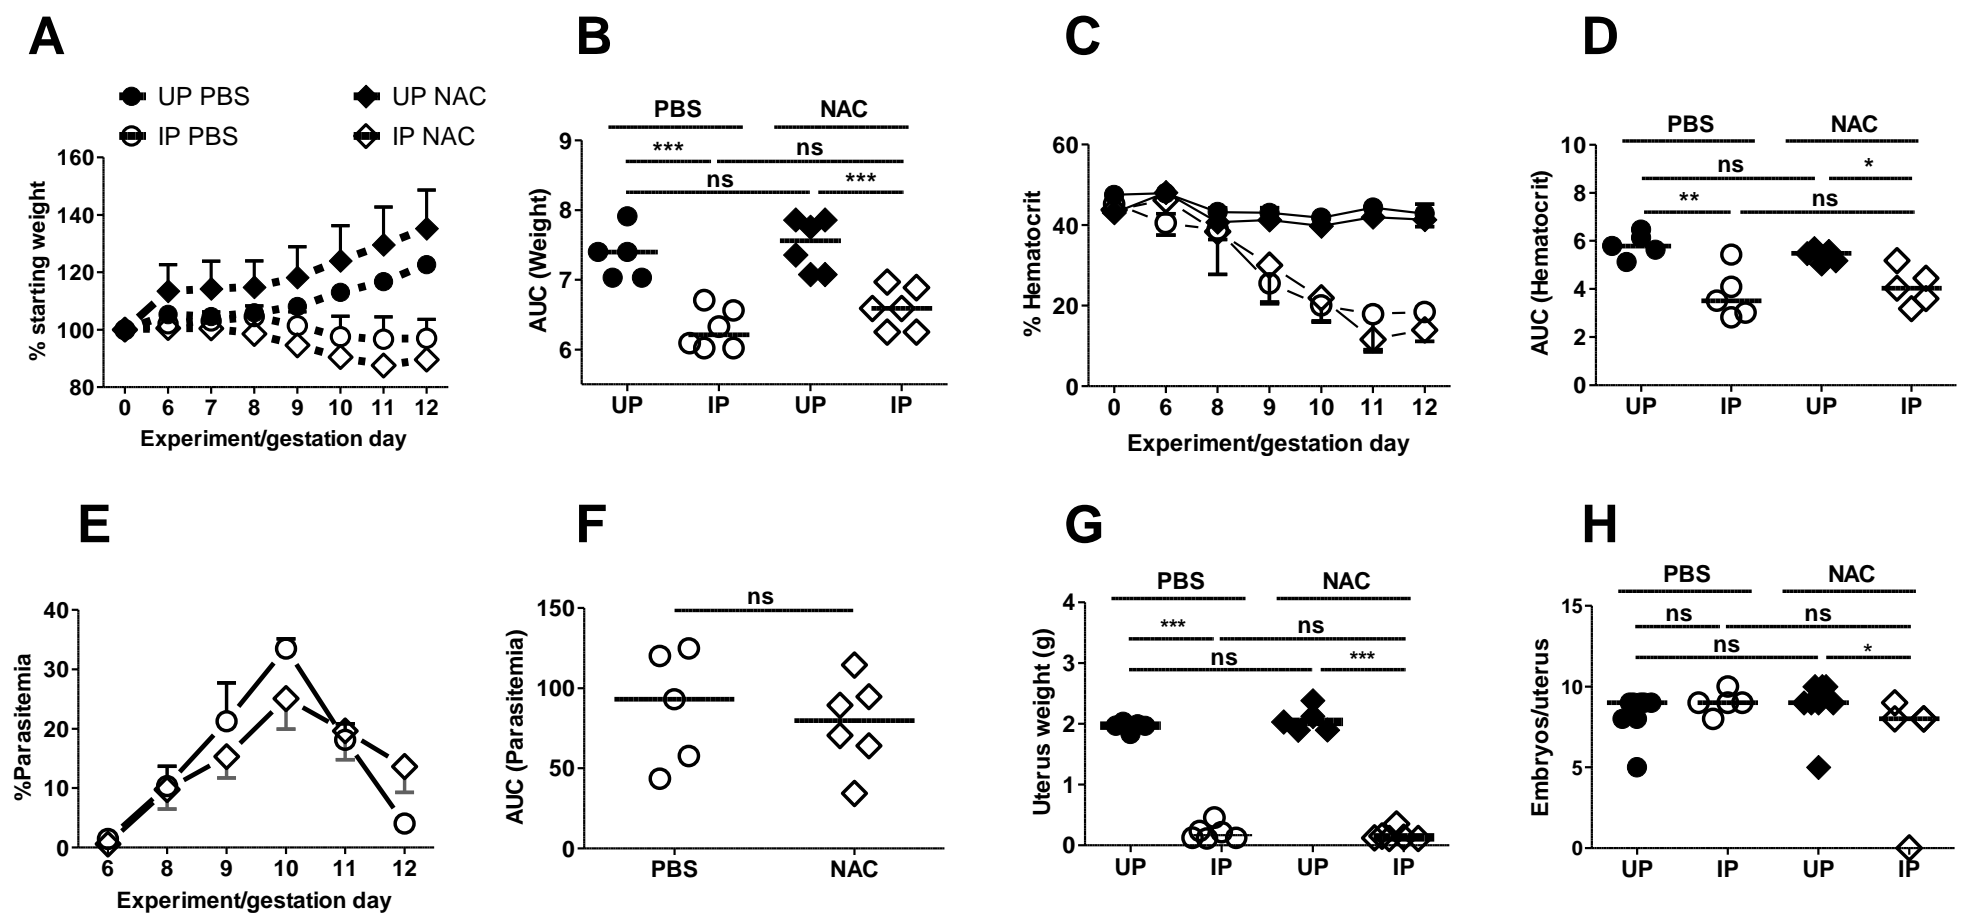

**Fig S1:** Course of *P. chabaudi* AS infection and pregnancy outcome in intraperitoneally-delivered N Actetylcysteine (NAC) and PBS-treated (control) mice from ED6 to ED12. Percent weight change (**A**) with area under the curve (AUC) (**B**) are indicated. Percent hematocrit (**C**) and AUC (**D**) also depict anemia in infected pregnant (IP) vs uninfected pregnant (UP) mice. Percent parasitemia (**E**) and AUC (**F**) are comparable in mice (Mann Whitney U test). Uterus weight (**G**) and embryo viability (**H**) do not show any improvement of pregnancy outcome in mice receiving treatment versus those treated with PBS. A Kruskal-Wallis test followed by Dunn's Multiple Comparison was used to verify statistical significance between the four experimental groups (UP NAC (closed diamond); UP PBS (closed circle); IP NAC (open diamond), and IP PBS (open circle)). Data depicted in panels A-F cumulatively represent 6 independent experiments (n=26 mice) sacrificed at ED12; panels G and H represent 5 independent experiments (n=21 mice) sacrificed at ED10. \*P<0.05; \*\*P<0.01; \*\*\*P<0.001; ns=not statistically significant.

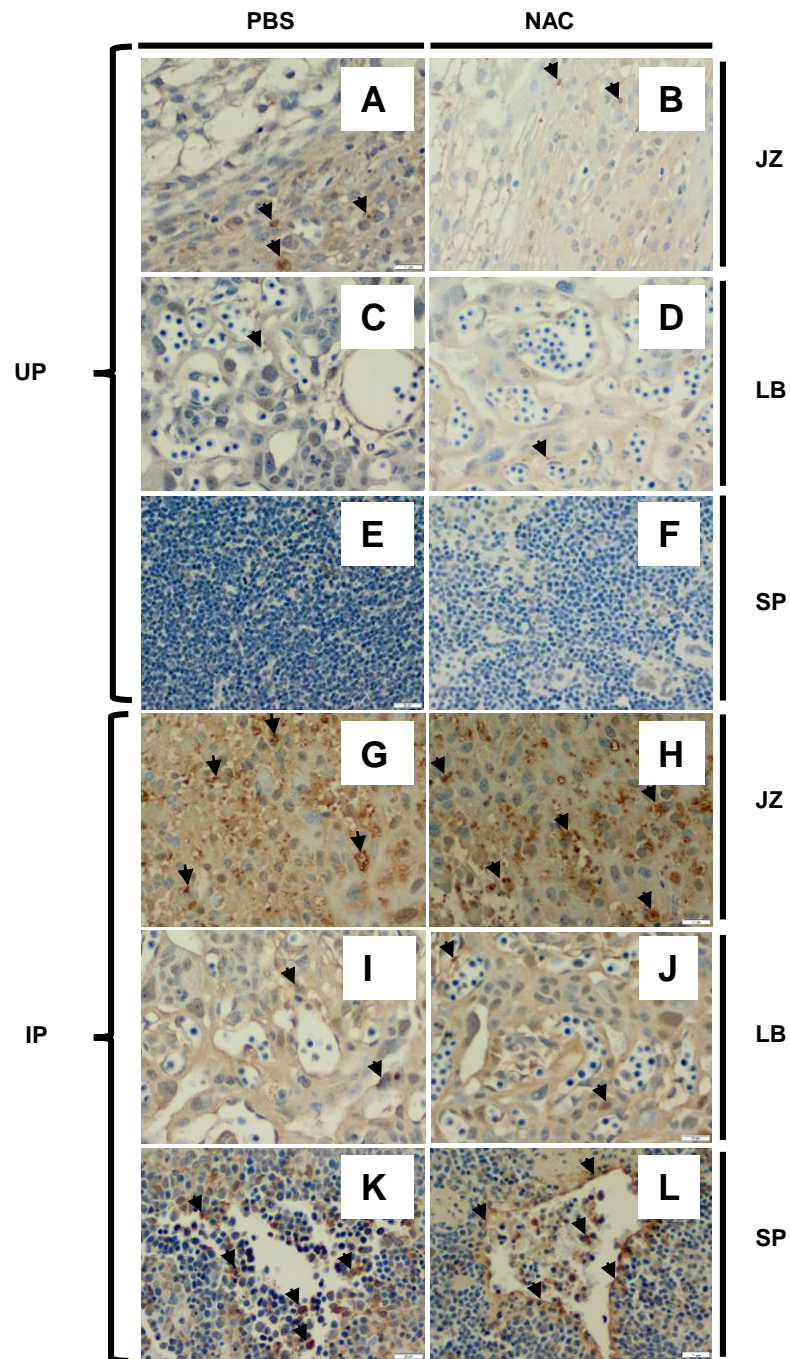

**Fig S2.** Representative immunostaining for 4-hydroxynonenal (HNE), marker of lipid peroxidation, in ED10 placenta and spleen from mice injected with N-acetyl cysteine (NAC) or control (PBS). Uninfected pregnant (UP) junctional zone (JZ; A, B), labyrinth (LB; C, D) and spleen (SP; E, F) show little staining regardless of treatment. Heavy staining is observed regardless of treatment in infected pregnant (IP) junctional zone (JZ; G, H), labyrinth (LB; I, J) and spleen (SP; K, L). This experiment was performed with samples from mice generated in 5 independent experiments.

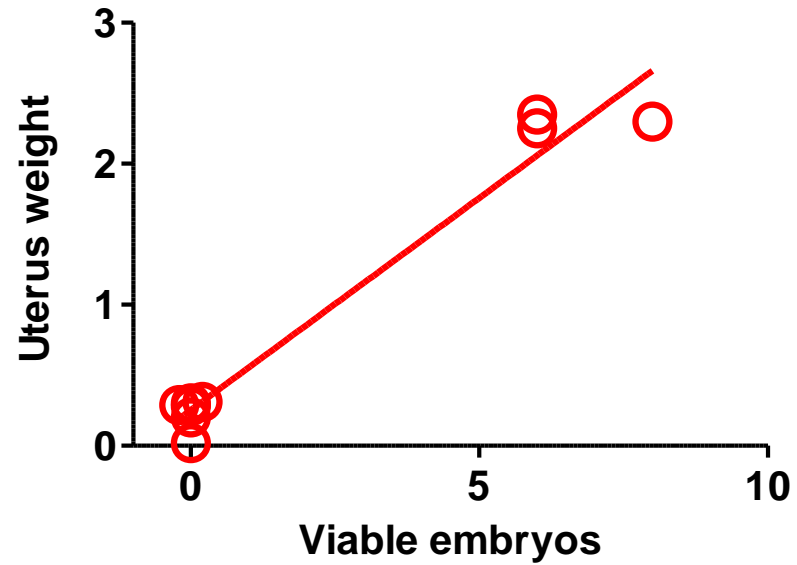

**Fig. S3:** Correlation of embryo viability and uterus weight in tempol-treated *P. chabaudi* AS-infected mice. The correlation is highly significant:  $r = 0.8584$ ,  $P = 0.0045$  by Spearman's correlation test.

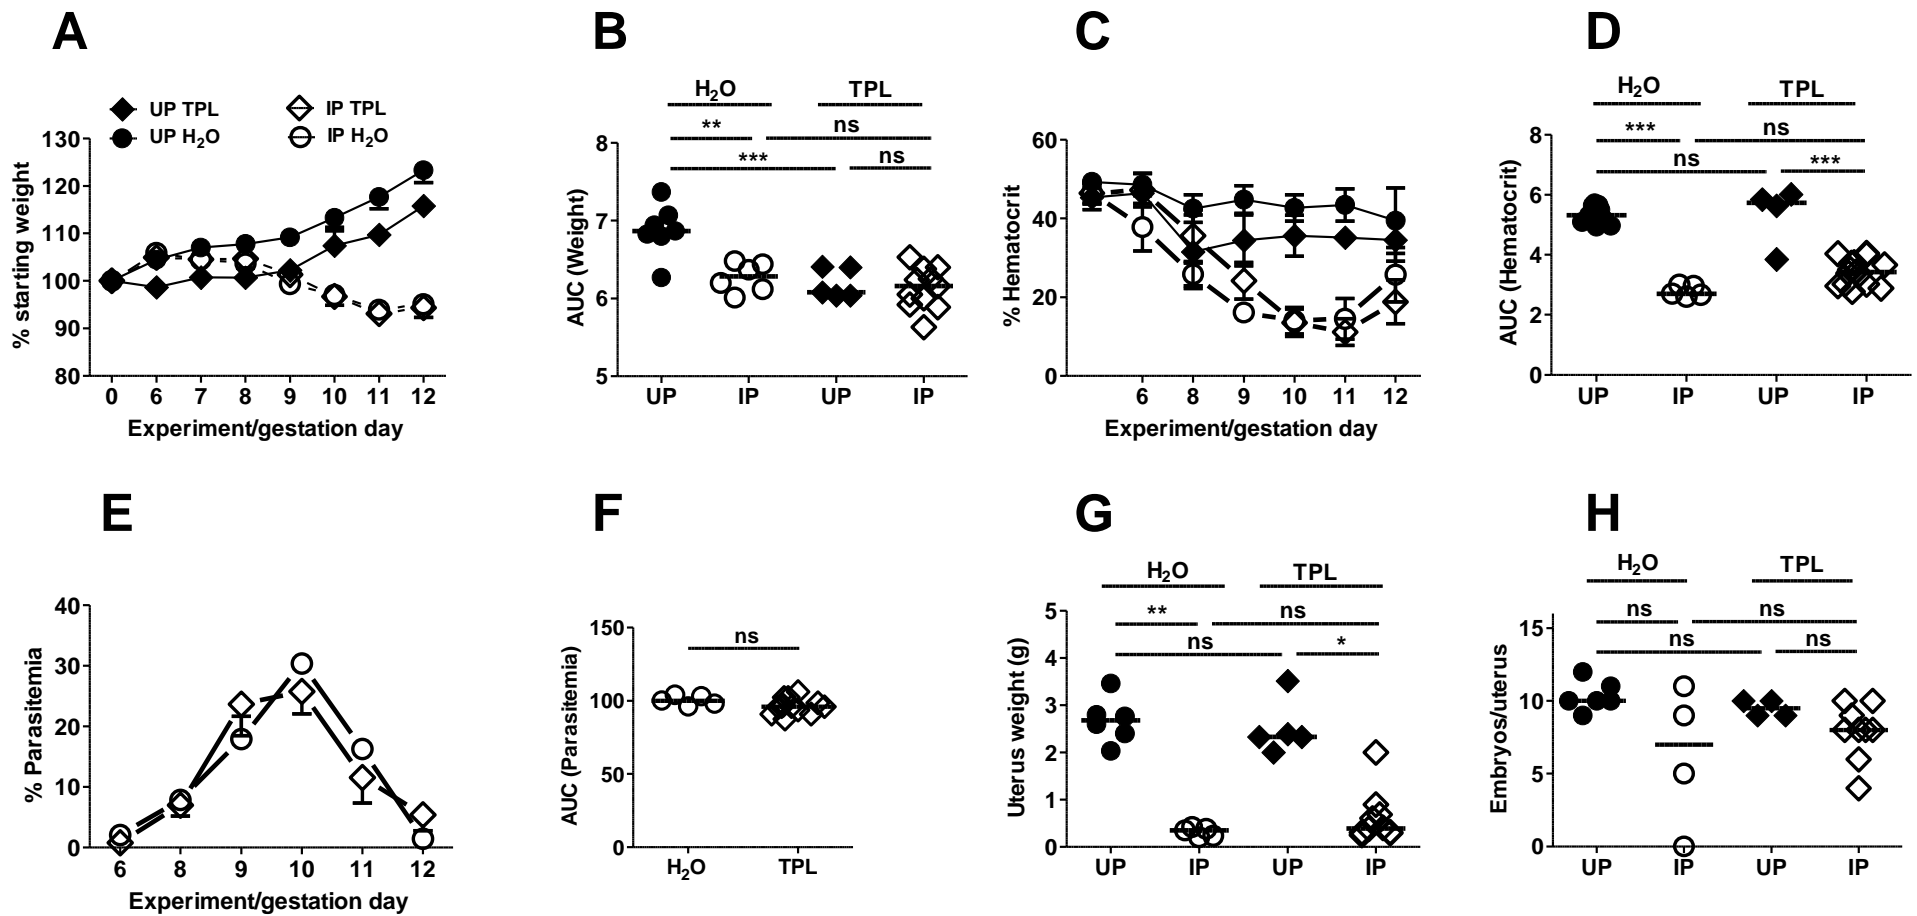

**Fig. S4:** Course of *P. chabaudi* AS infection and pregnancy outcome in orally-delivered Tempol (TPL) from ED6 to ED12 in B6 mice. Percent weight change (**A**) and area under the curve (AUC) (**B**) are indicated. Also depicted are percent hematocrit (**C**) and AUC (**D**) as well as percent parasitemia (**E**) and AUC (**F**) are comparable in mice orally-delivered TPL versus mice under drinking water (Mann Whitney U test). Pregnancy outcome as indicated by uterus weight (**G**) shows relative improvement with TPL and the number of embryo per uterus remains unchanged (**H**). A Kruskal-Wallis test followed by Dunn's Multiple Comparison test was used to verify statistical significance between the four experimental groups (uninfected pregnant (UP)-TPL (closed diamond); UP-H<sub>2</sub>O (closed circle); infected pregnant (IP)-TPL (open diamond), and IP-H<sub>2</sub>O (open circle)). Data depict 31 mice generated in 9 independent experiments. Number of embryo/uterus varies across the groups (Kruskal-Wallis test,  $P=0.0451$ ); pairwise post-hoc tests are not significant. \* $P<0.05$ ; \*\* $P<0.01$ ; \*\*\* $P<0.001$ ; ns=not statistically significant.
